# Supplementary material for: Product ion distributions using H 3 O + proton-transfer-reaction time-of-flight mass spectrometry (PTR-ToF-MS): mechanisms, transmission effects, and instrument-to-instrument variability
Source: Copernicus journal article supplement (doi:10.5194/amt-18-1013-2025), 2025-02-27
Supplement: Supplementary file 1 [file amt-18-1013-2025-supplement.zip]

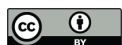

*Supplement of*

**Product ion distributions using  $\text{H}_3\text{O}^+$  proton-transfer-reaction time-of-flight mass spectrometry (PTR-ToF-MS): mechanisms, transmission effects, and instrument-to-instrument variability**

**Michael F. Link et al.**

*Correspondence to:* Michael F. Link ([michael.f.link@nist.gov](mailto:michael.f.link@nist.gov))

- [amt-18-1013-2025-supplement-title-page.pdf](#)
- PTR\_PID\_SI
  - [H3O\\_PID\\_Library\\_V7.xlsx](#)
  - [PTR\\_PID\\_SI.pdf](#)

The copyright of individual parts of the supplement might differ from the article licence.
